# Supplementary material for: Toward quantification of hypoxia using fluorinated EuII/III-containing ratiometric probes
Source: PubMed Central journal article supplement — Proc Natl Acad Sci U S A. 2023 Apr 5;120(15):e2220891120. doi: 10.1073/pnas.2220891120 (PMC10104500; doi:10.1073/pnas.2220891120), 2023-04-05
Supplement: pnas.2220891120.sapp.pdf [file pnas.2220891120.sapp.pdf]

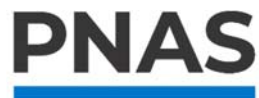

## Supplementary Information for

Toward quantification of hypoxia using fluorinated Eu<sup>III/II</sup>-containing ratiometric probes.

S. A. Amali S. Subasinghe,<sup>a</sup> Caitlyn J. Ortiz,<sup>b</sup> Jonathan Romero,<sup>b</sup> Cassandra L. Ward,<sup>c</sup> Alexander G. Sertage,<sup>a</sup> Lyazat Kurenbekova,<sup>d</sup> Jason T. Yustein,<sup>\*,e</sup> Robia G. Pautler,<sup>\*,b</sup> and Matthew J. Allen<sup>\*,a</sup>

<sup>a</sup> Department of Chemistry, Wayne State University, 5101 Cass Avenue, Detroit, Michigan 48202, USA.

<sup>b</sup> Department of Integrative Physiology, Baylor College of Medicine, Houston, Texas 77030, USA.

<sup>c</sup> Lumigen Instrument Center, Wayne State University, 5101 Cass Avenue, Detroit, Michigan 48202, USA.

<sup>d</sup> Department of Pediatrics, Texas Children's Cancer Center, Baylor College of Medicine, Houston, Texas 77030, USA.

<sup>e</sup> Aflac Cancer and Blood Disorders Center, Children's Healthcare of Atlanta, Emory University School of Medicine, 2015 Uppergate Drive, Atlanta, Georgia, 30322, USA.

\* Professors Matthew J. Allen, Robia G. Pautler, and Jason T. Yustein.

Email: mallen@chem.wayne.edu, rpautler@bcm.edu, and jason.yustein@emory.edu

### This PDF file includes:

Figures S1 to S4

Tables S1 to S2

## Supplementary Information Text

## Experimental Procedures

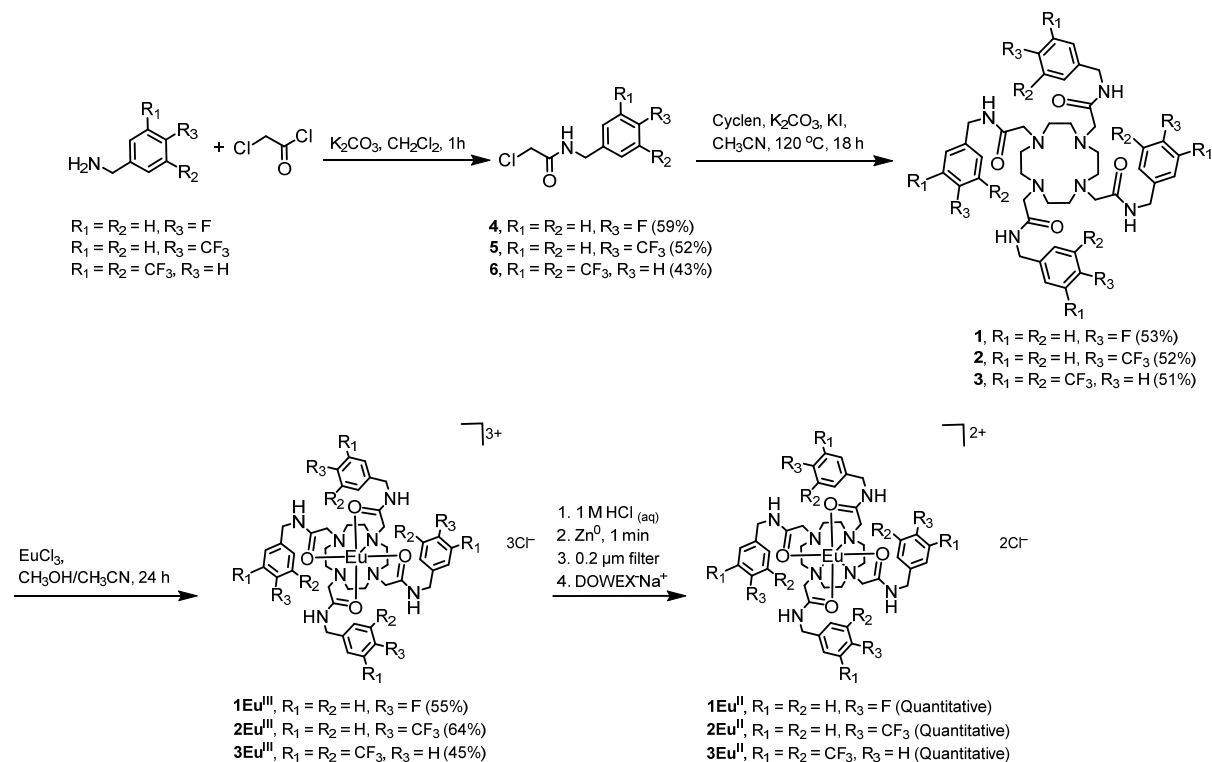

Figure S1. Reaction scheme for complexes studied.

<sup>1</sup>H-NMR Spectrum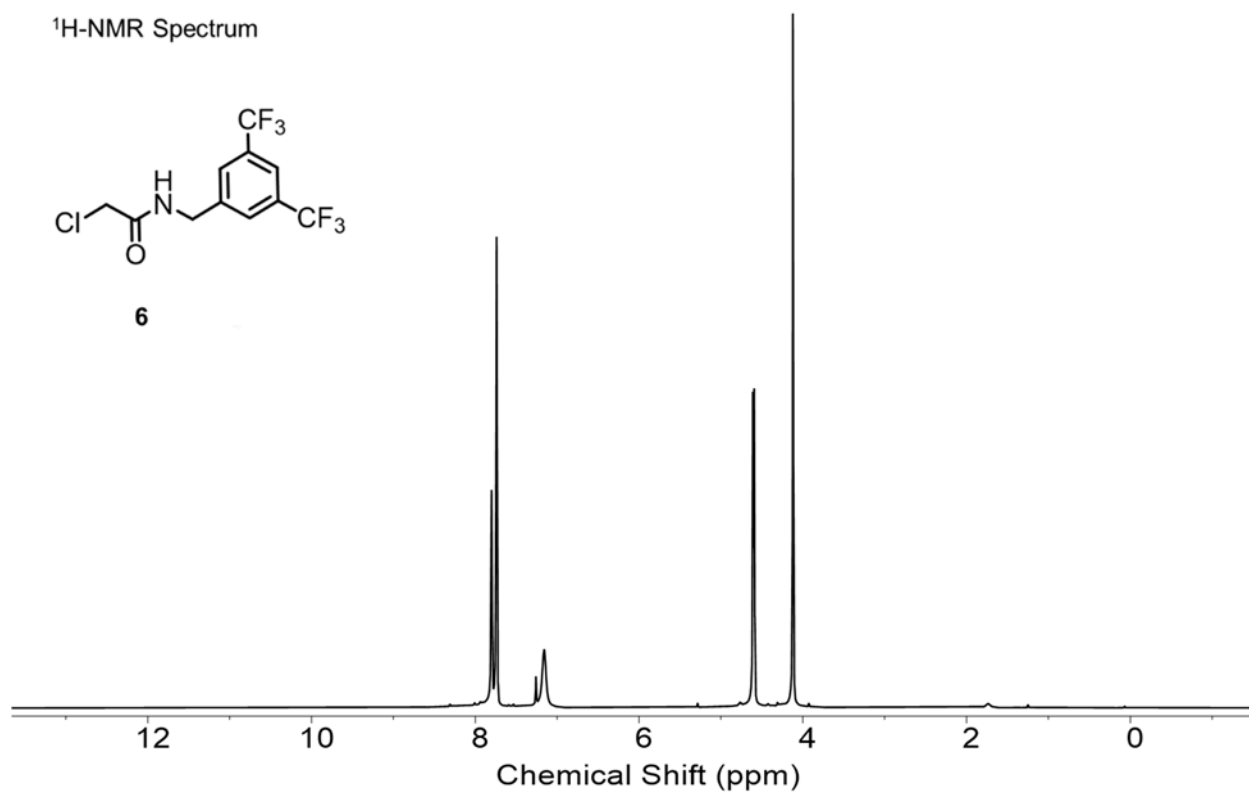

<sup>13</sup>C-NMR Spectrum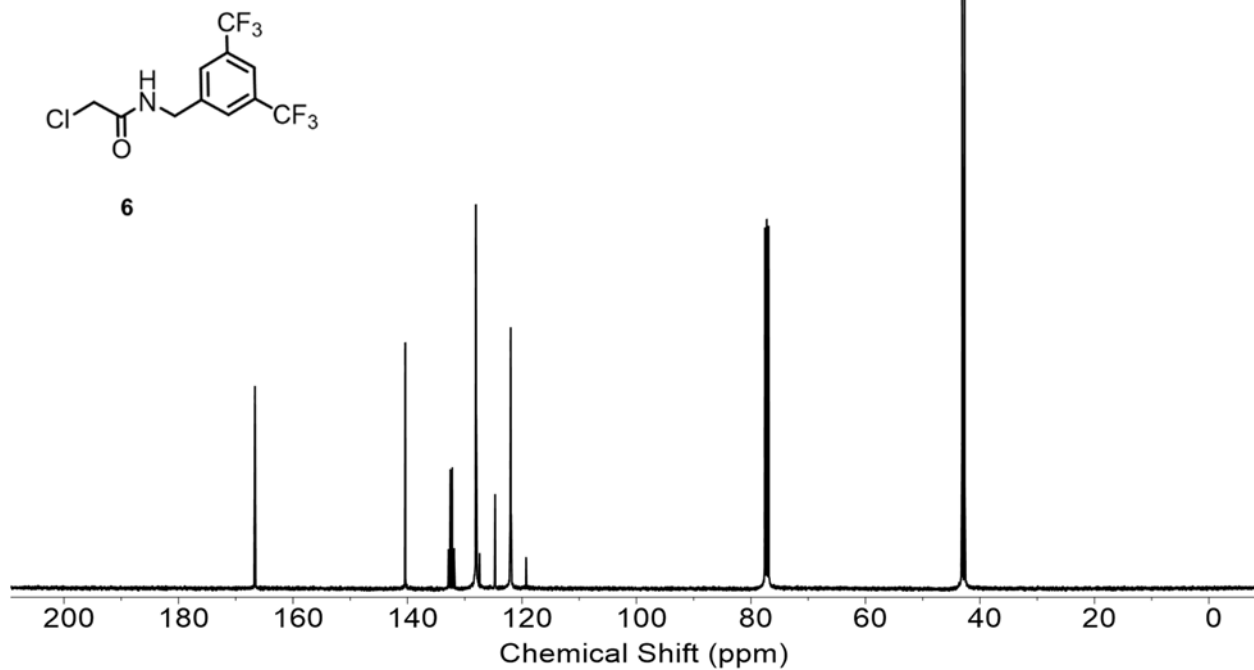<sup>19</sup>F-NMR Spectrum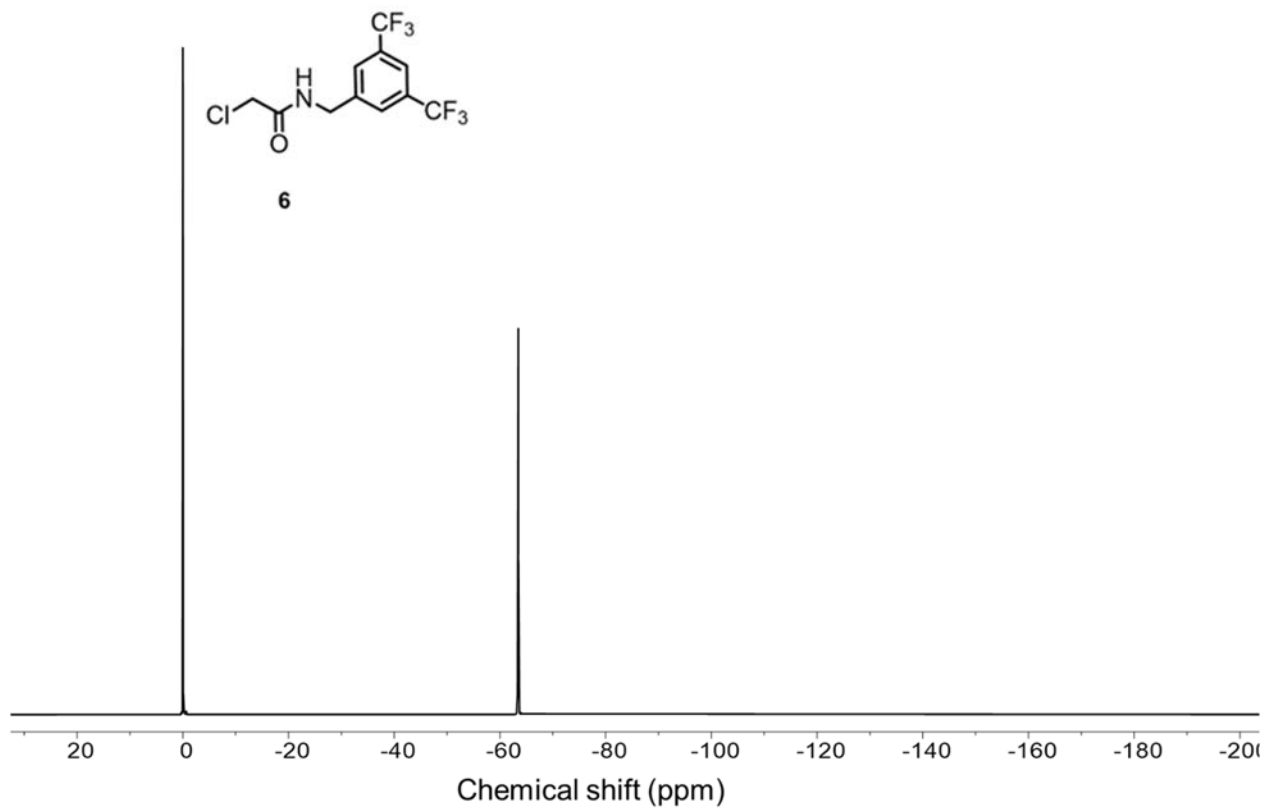

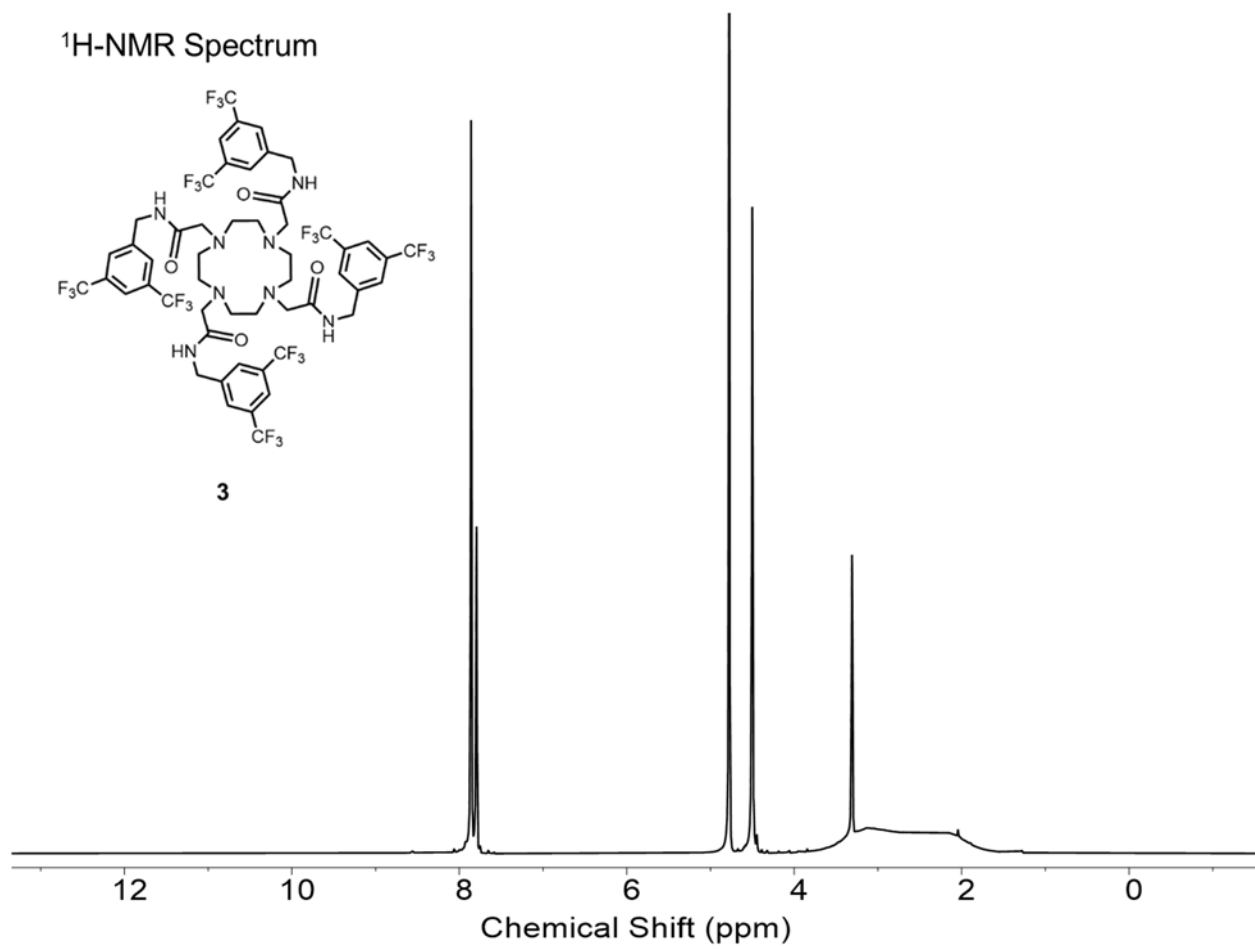

<sup>13</sup>C-NMR Spectrum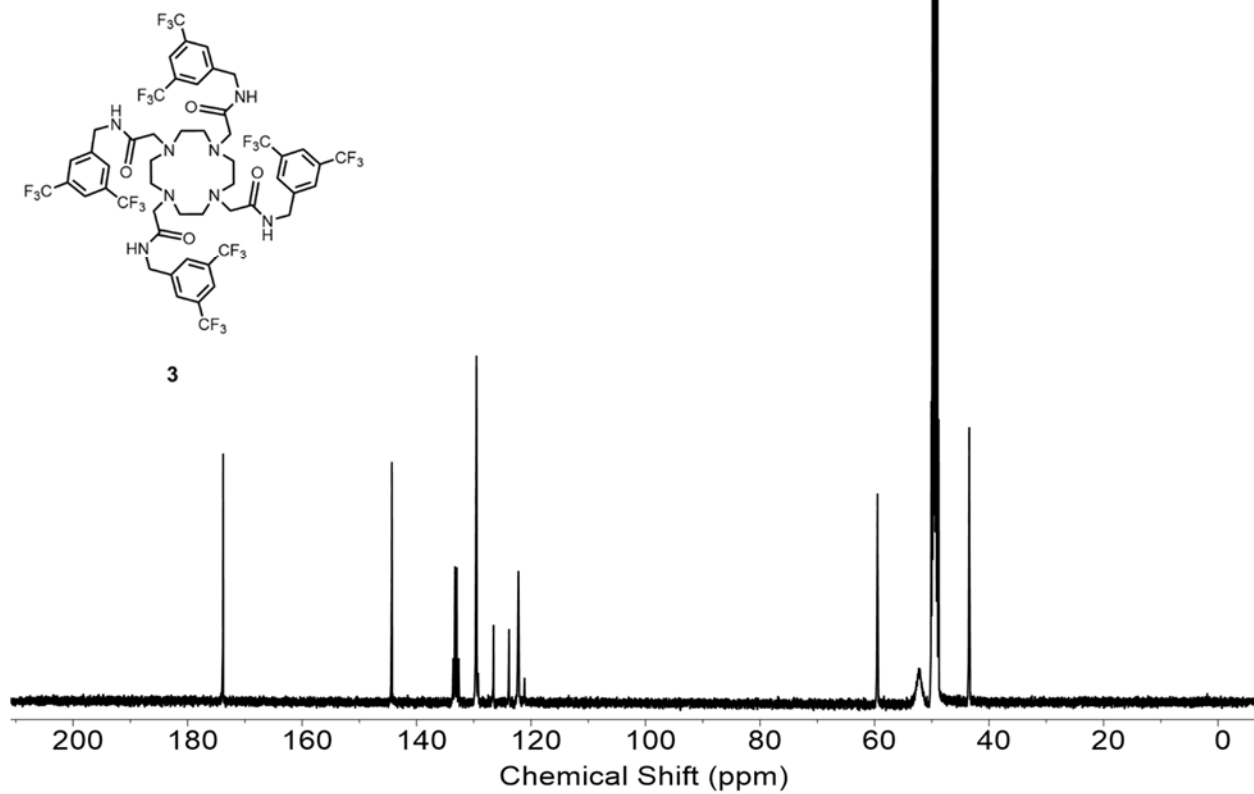<sup>19</sup>F-NMR Spectrum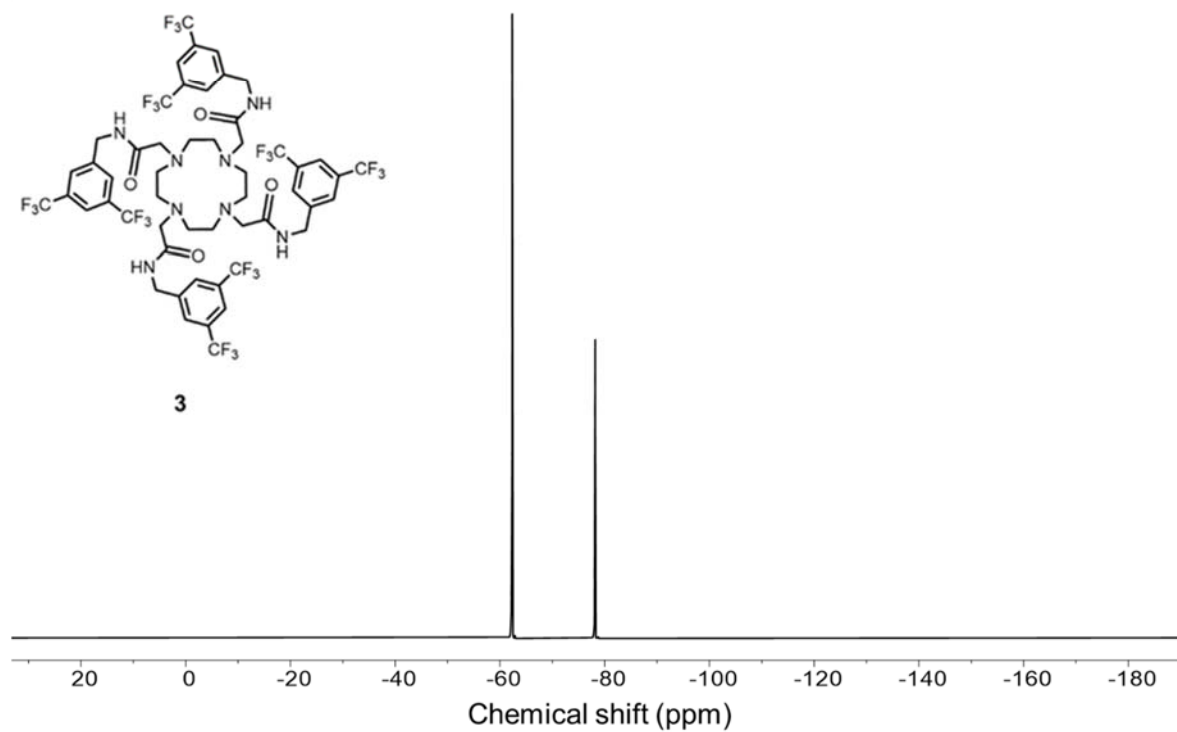

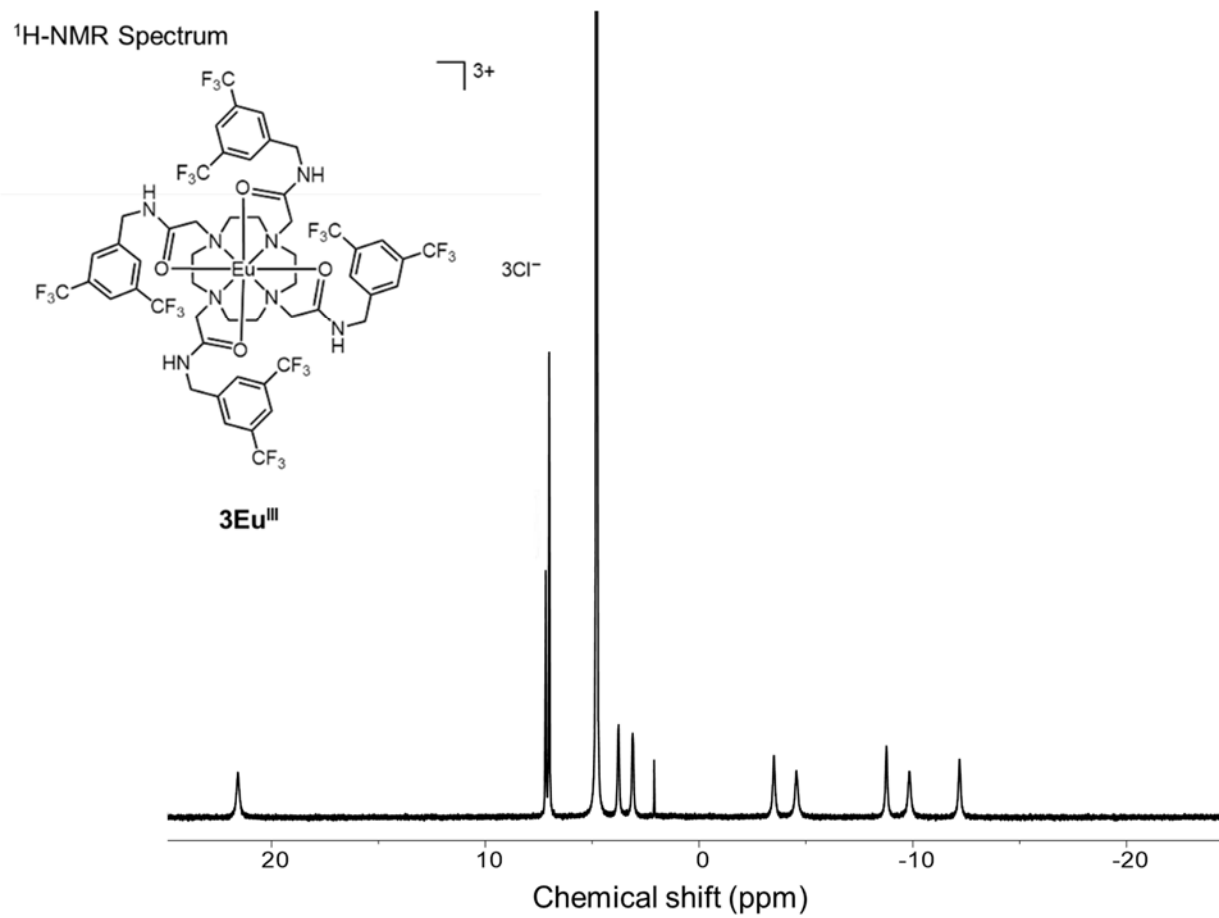

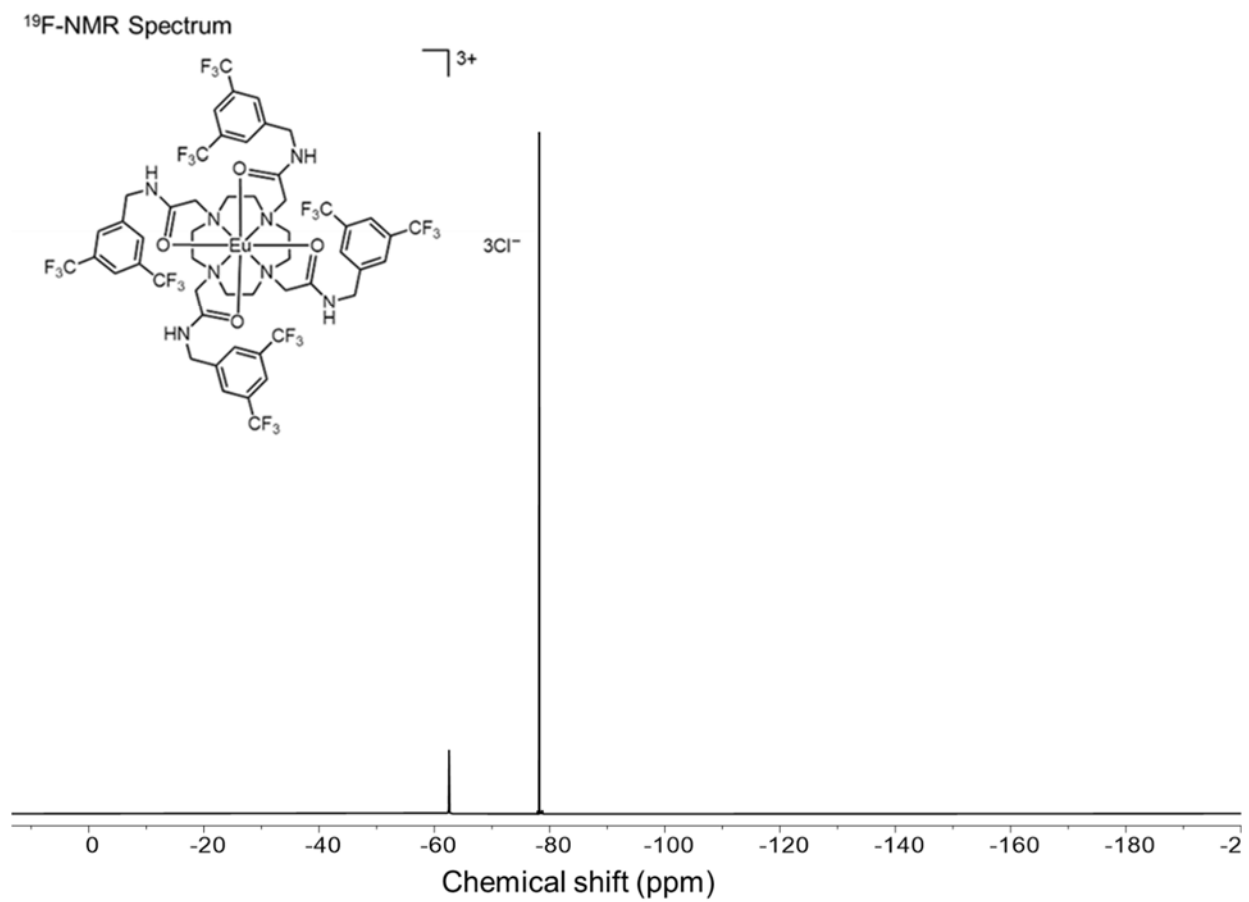



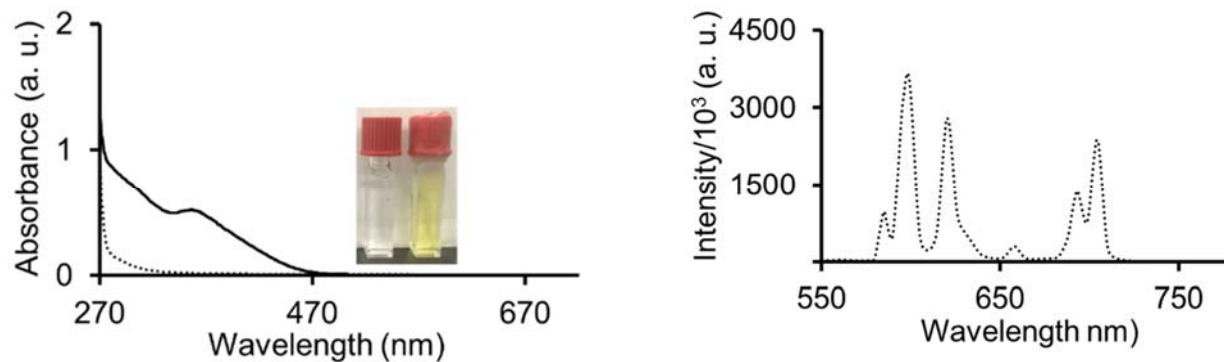

**Figure S2.** (Left) Absorption spectra of  $3\text{Eu}^{\text{II}}$  (solid line) and after oxidation into  $3\text{Eu}^{\text{III}}$  (dashed line). Quartz cuvettes represent solutions of  $3\text{Eu}^{\text{II}}$  (yellow) and  $3\text{Eu}^{\text{III}}$  (colorless) in water. (Right) Luminescence spectra of  $3\text{Eu}^{\text{II}}$  (solid line) and after oxidation into  $3\text{Eu}^{\text{III}}$  (dashed line).

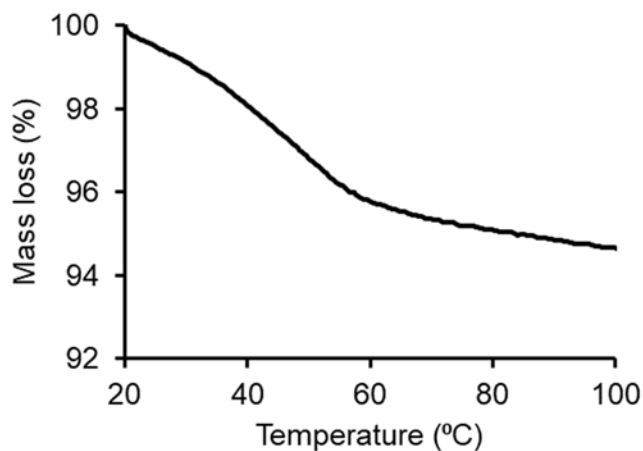

**Figure S3.** Thermal gravimetric analysis of  $3\text{Eu}^{\text{III}}$  indicating the presence of six water molecules per complex.

**Table S1.** Crystallographic properties of **1Eu<sup>III</sup>Cl<sub>3</sub>**, **1Eu<sup>II</sup>Cl<sub>2</sub>**, and **3Eu<sup>III</sup>Cl<sub>3</sub>**

| <b>Crystal Data</b>                                       | <b>1Eu<sup>III</sup>Cl<sub>3</sub></b>                                                                     | <b>1Eu<sup>II</sup>Cl<sub>2</sub></b>                                                                       | <b>3Eu<sup>III</sup>Cl<sub>3</sub></b>                                                                      |
|-----------------------------------------------------------|------------------------------------------------------------------------------------------------------------|-------------------------------------------------------------------------------------------------------------|-------------------------------------------------------------------------------------------------------------|
| Empirical formula                                         | C <sub>45.96</sub> H <sub>64.95</sub> Cl <sub>3</sub> EuF <sub>4</sub> N <sub>8.99</sub> O <sub>8.99</sub> | C <sub>46</sub> H <sub>63.25</sub> Cl <sub>2</sub> EuF <sub>4</sub> N <sub>9</sub> O <sub>8.25</sub>        | C <sub>53.03</sub> H <sub>59.56</sub> Cl <sub>3</sub> EuF <sub>23.98</sub> N <sub>8.52</sub> O <sub>9</sub> |
| Formula weight                                            | 1221.54                                                                                                    | 1173.16                                                                                                     | 1674.22                                                                                                     |
| Crystal size (mm)                                         | 0.081 × 0.166 × 0.208                                                                                      | 0.20 × 0.23 × 0.23                                                                                          | 0.124 × 0.185 × 0.207                                                                                       |
| Crystal color                                             | colorless                                                                                                  | yellow                                                                                                      | yellow                                                                                                      |
| Crystal System                                            | Monoclinic                                                                                                 | Triclinic                                                                                                   | Tetragonal                                                                                                  |
| Space Group                                               | <i>P</i> 2 <sub>1</sub> / <i>n</i>                                                                         | <i>P</i> $\bar{1}$                                                                                          | <i>I</i> 422                                                                                                |
| Unit Cell Dimensions                                      | a = 10.4681(6) Å<br>b = 47.867(3) Å<br>c = 11.6815(9) Å<br><br>β = 116.529(2)°                             | a = 20.456(2) Å<br>b = 23.512(3) Å<br>c = 24.127(2) Å<br>α = 82.196(3)°<br>β = 65.036(3)°<br>γ = 89.517(3)° | a = 14.3972(16) Å<br>b = 14.3972(16) Å<br>c = 33.011(4) Å                                                   |
| Volume (Å <sup>3</sup> )                                  | 5237.0(6)                                                                                                  | 10406.6(18)                                                                                                 | 6842.5(17)                                                                                                  |
| Z                                                         | 4                                                                                                          | 8                                                                                                           | 4                                                                                                           |
| F(000)                                                    | 2502.0                                                                                                     | 4810.0                                                                                                      | 3357.0                                                                                                      |
| Density (g cm <sup>-3</sup> )<br>(calculated)             | 1.549                                                                                                      | 1.498                                                                                                       | 1.625                                                                                                       |
| <b>Collection Data</b>                                    |                                                                                                            |                                                                                                             |                                                                                                             |
| Temperature (K)                                           | 100.0                                                                                                      | 100.0                                                                                                       | 110.0                                                                                                       |
| Wavelength (Å)                                            | 0.71073                                                                                                    | 0.71073                                                                                                     | 0.71073                                                                                                     |
| Abs. Coef. (mm <sup>-1</sup> )                            | 1.427                                                                                                      | 1.382                                                                                                       | 1.156                                                                                                       |
| R <sub>int</sub> , R <sub>sigma</sub>                     | 0.1758, 0.1566                                                                                             | 0.1466, 0.1113                                                                                              | 0.0430, 0.0221                                                                                              |
| 2θ range (°)                                              | 3.404 to 57.4                                                                                              | 1.882 to 51.014                                                                                             | 4 to 69.966                                                                                                 |
| Range of h, k, l                                          | -14→14, -64→64, -15→15                                                                                     | -24→24, -28→28, -29→29                                                                                      | -23→23, -22→22, -53→53                                                                                      |
| Reflections collected                                     | 125526                                                                                                     | 272525                                                                                                      | 99334                                                                                                       |
| <b>Refinement Data</b>                                    |                                                                                                            |                                                                                                             |                                                                                                             |
| No. indep. data                                           | 13492                                                                                                      | 38575                                                                                                       | 7549                                                                                                        |
| No. restraints                                            | 19924                                                                                                      | 18                                                                                                          | 770                                                                                                         |
| No. parameters                                            | 2222                                                                                                       | 2565                                                                                                        | 351                                                                                                         |
| Good of fit                                               | 1.050                                                                                                      | 1.027                                                                                                       | 1.071                                                                                                       |
| R[F <sup>2</sup> > 2σ], wR(F <sup>2</sup> )               | 0.0987, 0.2705                                                                                             | 0.0597, 0.1611                                                                                              | 0.0271, 0.0766                                                                                              |
| Δρ <sub>max</sub> /Δρ <sub>min</sub> (e Å <sup>-3</sup> ) | 0.82/-0.72                                                                                                 | 2.72/-2.01                                                                                                  | 3.35/-0.88                                                                                                  |
| Flack Parameter                                           | NA                                                                                                         | NA                                                                                                          | 0.039(12)                                                                                                   |

**Table S2.** Comparison of the slopes of the curves of **2Eu<sup>II</sup>/2Eu<sup>III</sup>** system at 1 mM and 6 mM concentrations using a *t*-test.

|              | <b>6 mM</b> | <b>1 mM</b> |
|--------------|-------------|-------------|
| Mean         | 0.49        | 0.43        |
| Variance     | 0.006629    | 0.002873    |
| Observations | 3           | 3           |

alpha = 0.05

P(T&lt;=t) two-tail = 0.4860

0.4860 &gt; 0.05

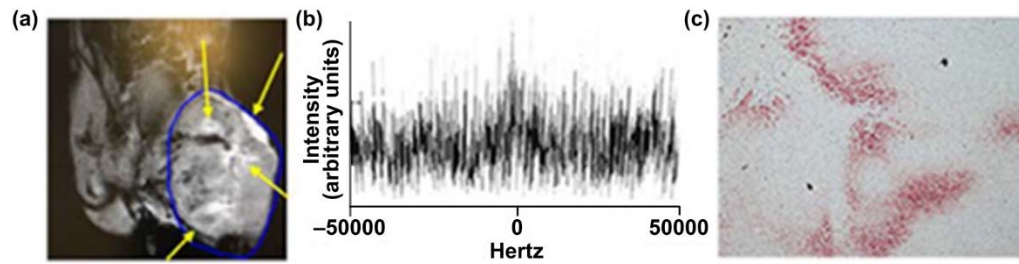

**Figure S4.** (a) Tumor injected with  $1\text{Eu}^{\text{II}}$ . Arrows identify positive  $T_1$ -weighted contrast enhancement, indicating hypoxia; (b) in agreement with  $^1\text{H}$ -MRI,  $^{19}\text{F}$  signal is weak, indicating tumor hypoxia; and (c) hypoxyprobe histological validation of MRI data.
